# Supplementary material for: NaCl-treated multiple carbon coating BaTiO3 nanoparticles towards enhancing dielectric properties
Source: Royal Society of Chemistry journal article supplement (doi:10.1039/d3tc01871g), 2023-01-01
Supplement: d3tc01871g1.pdf [file d3tc01871g1.pdf]

## Supporting Information

### **NaCl-treated multiple carbon coating BaTiO<sub>3</sub> nanoparticles towards enhancing dielectric properties**

Peng Wang, Zihao Guo, Zhihao Sun, Benli Du, Shaoyao Tian, Yu Qiu, Han Ding,

Lei Qian\*

*Key Laboratory for Liquid-Solid Structural Evolution and Processing of Materials*

*(Ministry of Education), Shandong University, 17923 Jingshi Road, Jinan 250061,*

*China*

\*Corresponding author, Email: qleric@sdu.edu.cn

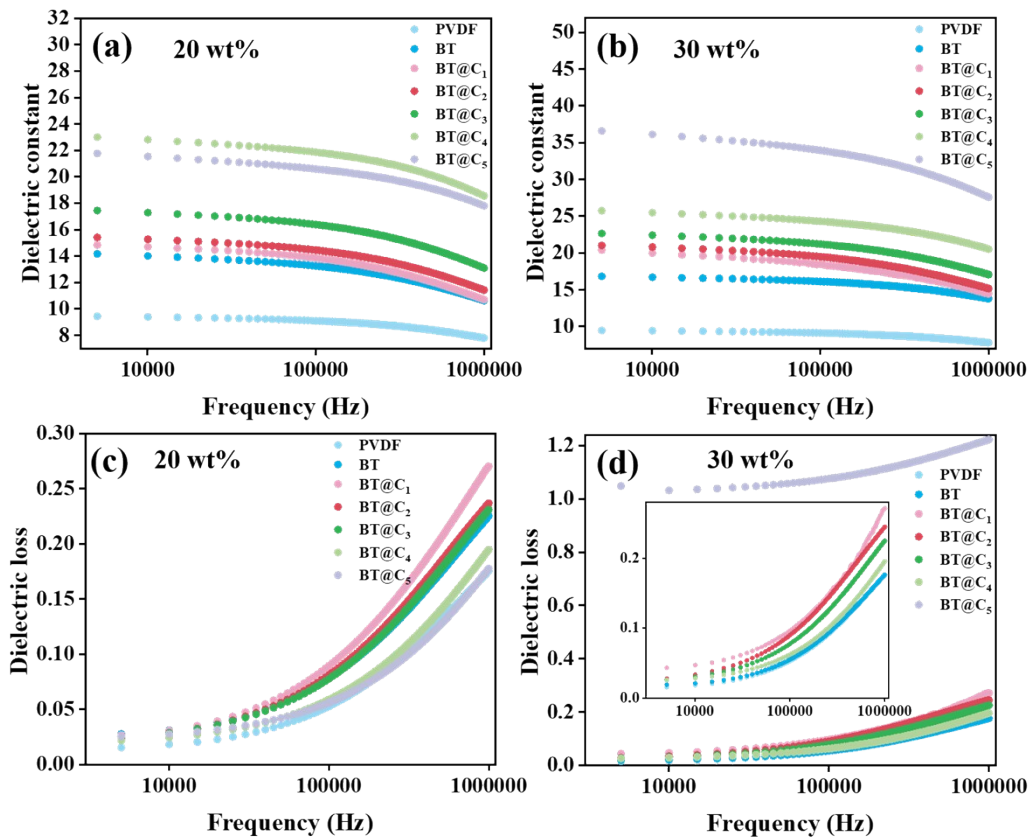

**Fig. S1.** The dielectric constant of BT@ $C_x$ /PVDF with 20 wt% (a); and 30 wt% (b) filling amounts; the dielectric loss of BT@ $C_x$ /PVDF with 20 wt% (c); and 30 wt% (d) filling amounts.

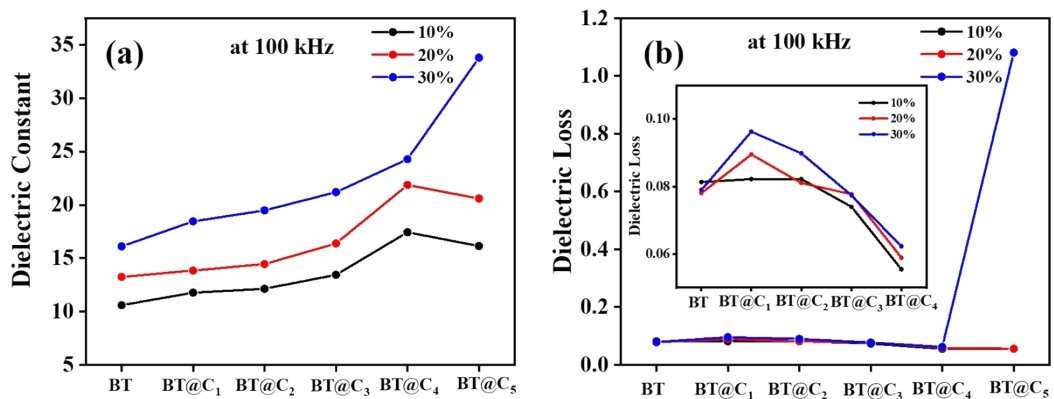

**Fig. S2.** The dielectric constant (a) and the dielectric loss (b) of BT@ $C_x$ /PVDF with 10 wt%, 20 wt%, and 30 wt% filling amounts at 100 kHz.
